# Supplementary material
Source: PubMed Central journal article supplement (PMC3356413)
Supplement: 11_363_Gross_Suppl.pdf [file 11_363_Gross_Suppl.pdf]

Supplemental Data

Excess Protein Synthesis in FXS Patient Lymphoblastoid Cells Can Be Rescued with a p110 $\beta$ -Selective Inhibitor

Christina Gross<sup>1,3</sup> and Gary J Bassell<sup>1,2,3</sup>

Online address: <http://www.molmed.org>

The Feinstein Institute for Medical Research North Shore LIJ

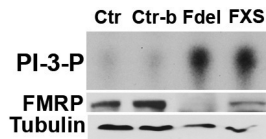

**Figure S1.** Increased PI3K activity in LCLs from FXS patients. PI3K activity was detected with a radioactive assay using phosphoinositide (PI) and radiolabeled ATP as substrate, followed by thin layer chromatography and autoradiography. An example autoradiography is shown for two different control LCLs (Ctr: cell line GM10851, Ctr-b: cell line J1), as well as LCLs from a patient with a deletion in the *fmr1* gene (Fdel: cell line DM316, no FMRP detectable by western blot, as shown below) and a patient with a full trinucleotide expansion (FXS: cell line GM03200, residual FMRP levels detectable).

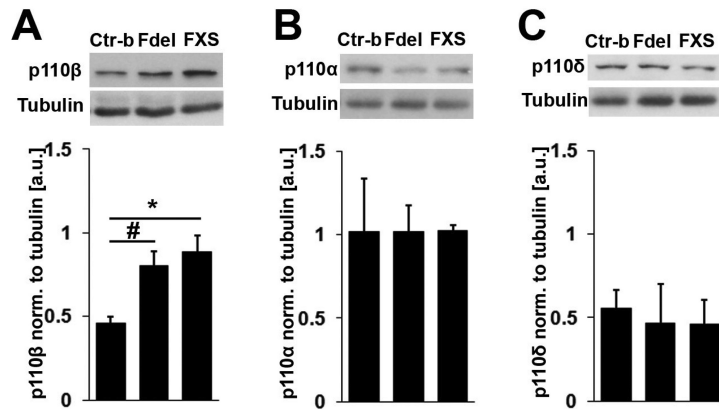

**Figure S2.** Protein levels of the PI3K catalytic subunit p110 $\beta$  (A) are increased in LCLs from FXS patients compared to a healthy control (Fdel, FXS and Ctr-b, as described in Figure S1), whereas p110 $\alpha$  (B) and p110 $\delta$  (C) levels were highly variable, but did not show any significant changes in the same protein samples, in which p110 $\beta$  was increased (n=3, separate 1-way ANOVAs for A, B and C, Tukey's posthoc tests: \*p=0.021, #p=0.048). Protein levels of p110 subunits were quantified by densitometry of western blots and normalized to tubulin on the same blots. Example western blots are shown on top.
